# Supplementary material for: Association between weight change and risk of liver fibrosis in adults with type 2 diabetes
Source: PubMed Central journal article supplement (PMC10586795; doi:10.7189/jogh.13.04138), 2023-10-20
Supplement: jogh-13-04138-s001.pdf [file jogh-13-04138-s001.pdf]

## **Supplementary Tables and Figures Legend**

**Table S1.** Features of the study population

**Table S2.** Weighted prevalence of liver fibrosis among participants

**Table S3.** Association of weight changes across three lifespans with liver fibrosis risk among T2D patients

**Table S4.** Association of weight changes across three lifespans with liver fibrosis risk among no-T2D participants

**Table S5.** Association of absolute weight change patterns with liver fibrosis risk among T2D patients

**Table S6.** Subgroup analysis of weight change patterns and liver fibrosis risk among T2D patients

**Table S7.** Population attributable fractions (PAF) for population counterfactuals of fibrosis among T2D patients

**Table S8.** Sensitivity analysis of the association between weight change and liver fibrosis in T2D patients

**Figure S1.** Dose-response curves of absolute weight change associated with liver fibrosis risk among T2D patients

**Table S1.** Features of the study population

| Participant characteristics                                                            | T2D( <i>n</i> =622) | No-T2D( <i>n</i> =1618) | <i>p</i> -value |
|----------------------------------------------------------------------------------------|---------------------|-------------------------|-----------------|
| LSM (kPa, mean ± SD)                                                                   | 7.07±4.45           | 5.79±4.89               | <0.001          |
| CAP (dB/m, mean ± SD)                                                                  | 300.75±58.68        | 264.32±57.39            | <0.001          |
| Age(years, mean ± SD)                                                                  | 66.06±8.75          | 64.09±8.99              | <0.001          |
| Males, ( <i>n</i> , %)                                                                 | 343(55.14)          | 793(49.01)              | 0.009           |
| Married, ( <i>n</i> , %)                                                               | 373(59.97)          | 889(54.94)              | 0.032           |
| College degree or above ( <i>n</i> , %)                                                | 341(54.82)          | 910(56.24)              | 0.631           |
| Disease duration (years) [M, (P <sub>25</sub> , P <sub>75</sub> )]                     | 11.50(5, 20)        | -                       | -               |
| Non-Hispanic White, ( <i>n</i> , %)                                                    | 204(32.80)          | 662(40.92)              | <0.001          |
| BMI <sub>2017 - 2018 cycle</sub> (kg/m <sup>2</sup> , mean ± SD)                       | 31.86±6.93          | 28.58±6.18              | <0.001          |
| BMI <sub>at 10 years prior the 2017 - 2018 cycle</sub> (kg/m <sup>2</sup> , mean ± SD) | 31.75±6.92          | 27.74±5.72              | <0.001          |
| BMI <sub>at age 25 years</sub> (kg/m <sup>2</sup> , mean ± SD)                         | 24.65±5.81          | 22.95±4.14              | <0.001          |
| WC (cm, mean ± SD)                                                                     | 108.94±15.35        | 99.87±14.64             | <0.001          |
| SBP (mmHg, mean ± SD)                                                                  | 135.76±20.87        | 133.87±20.38            | 0.051           |
| DBP (mmHg, mean ± SD)                                                                  | 70.05±14.40         | 73.96±13.19             | <0.001          |
| Current smoking, ( <i>n</i> , %)                                                       | 294(47.27)          | 767(47.40)              | 0.954           |

|                                           |               |               |        |
|-------------------------------------------|---------------|---------------|--------|
| Alcohol consumption (cup/d, mean ± SD)    | 1.69±0.23     | 1.71±0.27     | 0.094  |
| Moderate PA, ( <i>n</i> , %)              | 227(36.50)    | 395(24.41)    | 0.052  |
| ALT (U/L, mean ± SD)                      | 22.67±16.27   | 21.20±13.65   | 0.015  |
| AST (U/L, mean ± SD)                      | 22.00±13.69   | 22.33±10.75   | 0.279  |
| GGT (IU/L, mean ± SD)                     | 37.73±45.93   | 32.28±42.06   | 0.006  |
| LDH (IU/L, mean ± SD)                     | 166.45±36.17  | 161.33±41.68  | 0.005  |
| Albumin to globulin ratio (mean ± SD)     | 1.35±0.24     | 1.36±0.24     | <0.001 |
| Uric acid to creatinine ratio (mean ± SD) | 6.39±2.10     | 6.25±1.72     | 0.059  |
| hs-CRP (mg/L, mean ± SD)                  | 5.59±10.15    | 3.72±7.08     | <0.001 |
| HbA1c (%)                                 | 7.32±1.49     | 5.63±0.35     | <0.001 |
| TC (mg/dl, mean ± SD)                     | 198.72±41.68  | 179.05±46.94  | <0.001 |
| TG (mg/dl, mean ± SD)                     | 173.15±129.45 | 139.17±108.65 | <0.001 |
| Platelet count (10 <sup>9</sup> /L)       | 233.01±64.26  | 230.62±60.85  | 0.413  |
| Combined HTN ( <i>n</i> , %)              | 215(34.57)    | 595(36.77)    | 0.330  |
| Combined DLP ( <i>n</i> , %)              | 192(30.87)    | 425(26.27)    | 0.029  |
| Combined CVD ( <i>n</i> , %)              | 233(37.46)    | 448(27.69)    | <0.001 |
| Combined Cancer ( <i>n</i> , %)           | 104(16.72)    | 267(16.50)    | 0.901  |

Abbreviation: ALT, Alanine Aminotransferase; AST, Aspartate Aminotransferase; BMI, Body Mass Index; CAP, controlled attenuation parameter; CVD, Cardiovascular Diseases; DBP, Diastolic Blood Pressure; DLP, Dyslipidemia; GGT, Gamma Glutamyl Transferase; HbA1c, Glycated hemoglobin A1; HS-CRP, high-sensitivity C-reactive protein; HTN, Hypertension; LSM, Liver Stiffness Measurements; LDH, Lactate Dehydrogenase; M, Median; PA, Physical Activity; SD, standard deviations; SBP, Systolic Blood Pressure; T2D, Type 2 diabetes; TC, Total Cholesterol; TG, Total Triglycerides; WC, Waist Circumference;

**Table S2.** Weighted prevalence of liver fibrosis among participants[n(weighted prevalence, (95% CI)]

| Group                        | T2D(n=622)                           | No-T2D(n=1618)                   |
|------------------------------|--------------------------------------|----------------------------------|
| Any degree of liver fibrosis | 131(23.04%, 95% CI: 17.86% - 29.20%) | 150(6.70%, 95% CI:5.10% - 8.16%) |
| LSM (kPa)                    |                                      |                                  |
| 8.2~                         | 39(7.21%, 95% CI: 4.49% -11.38%)     | 57(2.05%, 95% CI: 1.35% - 3.10%) |
| 9.7~                         | 51(8.44%, 95% CI: 5.58% - 12.57%)    | 55(2.55%, 95% CI: 1.69% - 3.83%) |
| 13.6≥                        | 41(7.39%, 95%CI: 4.24% - 12.59%)     | 38(2.10%, 95% CI: 1.15% - 3.81%) |

Abbreviation: 95%CI, 95% confidence intervals; Liver Stiffness Measurements; T2D, type 2 diabetes

**Table S3.** Association of weight changes across three lifespans with liver fibrosis risk among T2D patients

| Liver Fibrosis                                                         | Weight change patterns |             |                 |                 |
|------------------------------------------------------------------------|------------------------|-------------|-----------------|-----------------|
|                                                                        | Stable Non-obese       | Weight Loss | Weight Gain     | Stable Obese    |
|                                                                        | Reference              | OR (95%CI)  | OR (95%CI)      | OR (95%CI)      |
| <b>BMI<sub>age 25</sub> to BMI<sub>10 years prior</sub></b>            |                        |             |                 |                 |
| Events /Total                                                          | 42/278                 | 0/11        | 73/276          | 16/57           |
| Model 1                                                                | 1.00                   | -           | 2.02(1.32,3.09) | 2.19(1.13,4.26) |
| Model 2                                                                | 1.00                   | -           | 2.05(1.34,3.14) | 2.04(1.04,4.01) |
| Model 3                                                                | 1.00                   | -           | 1.86(1.17,2.95) | 1.89(1.01,3.91) |
| <b>BMI<sub>age 25</sub> to BMI<sub>2017 - 2018 cycle</sub></b>         |                        |             |                 |                 |
|                                                                        | Stable Non-obese       | Weight Loss | Weight Gain     | Stable Obese    |
|                                                                        | Reference              | OR (95%CI)  | OR (95%CI)      | OR (95%CI)      |
| Events /Total                                                          | 32/263                 | 0/16        | 83/291          | 16/52           |
| Model 1                                                                | 1.00                   | -           | 2.88(1.84,4.51) | 3.21(1.60,6.43) |
| Model 2                                                                | 1.00                   | -           | 2.95(1.87,4.65) | 3.18(1.56,6.49) |
| Model 3                                                                | 1.00                   | -           | 2.53(1.55,4.11) | 2.89(1.35,6.21) |
| <b>BMI<sub>10 years prior</sub> to BMI<sub>2017 - 2018 cycle</sub></b> |                        |             |                 |                 |
|                                                                        | Stable Non-obese       | Weight Loss | Weight Gain     | Stable Obese    |
|                                                                        | Reference              | OR (95%CI)  | OR (95%CI)      | OR (95%CI)      |

| Events /Total | 24/213 | 8/66            | 18/76           | 81/267          |
|---------------|--------|-----------------|-----------------|-----------------|
| Model 1       | 1.00   | 1.09(0.46,2.55) | 2.44(1.24,4.82) | 3.43(2.08,5.65) |
| Model 2       | 1.00   | 1.06(0.42,2.40) | 2.47(1.23,4.90) | 3.49(2.14,5.89) |
| Model 3       | 1.00   | 1.00(0.39,2.31) | 2.06(0.98,4.22) | 3.13(1.84,5.48) |

Abbreviation: BMI, body mass index; OR, odds ratios; 95%CI, 95% confidence intervals; T2D, type 2 diabetes

Model 1: crude model.

Model 2: Adjusted for sex and age.

Model 3: Adjusted for sex, age, education, marital status, smoking, alcohol consumption, physical activity, SBP, DBP, WC, ALT, AST, GGT, LDH, hs-CRP, Uric acid to creatinine ratio, Albumin to globulin ratio TC, TG, Platelet count, dyslipidemia, hypertension, CVD, and cancer.

**Table S4.** Association of weight changes across three lifespans with liver fibrosis risk among no-T2D participants

| Liver Fibrosis                                                         | Weight change patterns        |                           |                           |                            |
|------------------------------------------------------------------------|-------------------------------|---------------------------|---------------------------|----------------------------|
|                                                                        | Stable Non-obese<br>Reference | Weight Loss<br>OR (95%CI) | Weight Gain<br>OR (95%CI) | Stable Obese<br>OR (95%CI) |
| <b>BMI<sub>age 25</sub> to BMI<sub>10 years prior</sub></b>            |                               |                           |                           |                            |
| Events /Total                                                          | 83/1167                       | 1/12                      | 57/375                    | 9/64                       |
| Model 1                                                                | 1.00                          | 1.19(0.15, 9.31)          | 2.34(1.63, 3.35)          | 2.14(1.02, 4.78)           |
| Model 2                                                                | 1.00                          | 1.16(0.42, 9.18)          | 2.27(1.58, 3.26)          | 2.09(1.00, 4.41)           |
| Model 3                                                                | 1.00                          | 0.08(0.01, 11.48)         | 2.24(1.51, 3.33)          | 1.89(0.83, 4.30)           |
| <b>BMI<sub>age 25</sub> to BMI<sub>2017 - 2018 cycle</sub></b>         |                               |                           |                           |                            |
|                                                                        | Stable Non-obese<br>Reference | Weight Loss<br>OR (95%CI) | Weight Gain<br>OR (95%CI) | Stable Obese<br>OR (95%CI) |
| Events /Total                                                          | 64/1033                       | 1/24                      | 76/509                    | 9/52                       |
| Model 1                                                                | 1.00                          | 0.66(0.08, 4.95)          | 2.66(1.87, 3.78)          | 3.17(1.48, 6.79)           |
| Model 2                                                                | 1.00                          | 0.58(0.08, 4.14)          | 2.83(1.99, 4.04)          | 3.46(1.59, 7.51)           |
| Model 3                                                                | 1.00                          | 0.02(0.001, 1.52)         | 3.32(2.20, 5.01)          | 3.28(1.40, 7.67)           |
| <b>BMI<sub>10 years prior</sub> to BMI<sub>2017 - 2018 cycle</sub></b> |                               |                           |                           |                            |
|                                                                        | Stable Non-obese<br>Reference | Weight Loss<br>OR (95%CI) | Weight Gain<br>OR (95%CI) | Stable Obese<br>OR (95%CI) |

| Events /Total | 58/949 | 7/108            | 26/230           | 59/331           |
|---------------|--------|------------------|------------------|------------------|
| Model 1       | 1.00   | 1.07(0.47, 2.40) | 1.96(1.20, 3.19) | 3.33(2.26, 4.91) |
| Model 2       | 1.00   | 0.98(0.44, 2.22) | 2.20(1.34, 3.62) | 3.28(2.08, 4.69) |
| Model 3       | 1.00   | 0.88(0.36, 2.13) | 1.79(0.45, 4.41) | 2.63(1.40, 4.42) |

Abbreviation: BMI, body mass index; OR, odds ratios; 95%CI, 95% confidence intervals;

Model 1: crude model.

Model 2: Adjusted for sex and age.

Model 3: Adjusted for sex, age, education, marital status, smoking, alcohol consumption, physical activity, SBP, DBP, WC, ALT, AST, GGT, LDH, hs-CRP, Uric acid to creatinine ratio, Albumin to globulin ratio TC, TG, Platelet count, dyslipidemia, hypertension, CVD, and cancer.

**Table S5.** Association of absolute weight change patterns with liver fibrosis risk among T2D patients



| Liver Fibrosis                                                         | Weight change<br>within 2.5 kg | Weight loss<br>≥2.5 kg<br>OR (95%CI) | Weight gain ≥2 .5 kg<br>and <10.0 kg<br>OR (95%CI) | Weight gain ≥10 kg<br>and <20 kg<br>OR (95%CI) | Weight gain ≥20<br>kg<br>OR (95%CI) |
|------------------------------------------------------------------------|--------------------------------|--------------------------------------|----------------------------------------------------|------------------------------------------------|-------------------------------------|
| <b>BMI<sub>age 25</sub> to BMI<sub>10 years prior</sub></b>            |                                |                                      |                                                    |                                                |                                     |
| Events/Total                                                           | 10/56                          | 2/26                                 | 20/124                                             | 34/187                                         | 65/229                              |
| Model 1                                                                | 1.00                           | 0.38 (0.06,1.60)                     | 0.88(0.39,2.10)                                    | 1.02(0.48,2.32)                                | 1.82(0.90,4.02)                     |
| Model 2                                                                | 1.00                           | 0.40(0.06,1.66)                      | 0.98(0.43,2.34)                                    | 1.13(0.53,2.58)                                | 1.20(0.98,4.44)                     |
| Model 3                                                                | 1.00                           | 0.38(0.06,1.63)                      | 1.04(0.45,2.56)                                    | 1.12(0.51,2.61)                                | 1.73(0.82,3.91)                     |
| <b>BMI<sub>age 25</sub> to BMI<sub>2017 - 2018 cycle</sub></b>         |                                |                                      |                                                    |                                                |                                     |
| Events/Total                                                           | 11/39                          | 4/65                                 | 12/98                                              | 28/161                                         | 76/259                              |
| Model 1                                                                | 1.00                           | 0.17(0.04,0.53)                      | 0.36(0.14,0.90)                                    | 0.54(0.24,1.23)                                | 1.06(0.51,2.32)                     |
| Model 2                                                                | 1.00                           | 0.16(0.04,0.52)                      | 0.37(0.14,0.94)                                    | 0.55(0.25,1.30)                                | 1.13(0.54,2.51)                     |
| Model 3                                                                | 1.00                           | 0.19(0.05,0.67)                      | 0.47(0.18,1.31)                                    | 0.62(0.26,1.59)                                | 1.32(0.59,3.22)                     |
| <b>BMI<sub>10 years prior</sub> to BMI<sub>2017 - 2018 cycle</sub></b> |                                |                                      |                                                    |                                                |                                     |
| Events/Total                                                           | 15/92                          | 47/265                               | 28/139                                             | 22/79                                          | 19/47                               |
| Model 1                                                                | 1.00                           | 1.11(0.60,2.15)                      | 1.29(0.66,2.64)                                    | 1.98(0.95,4.22)                                | 3.48(1.57,7.89)                     |
| Model 2                                                                | 1.00                           | 1.08(0.58,2.10)                      | 1.30(0.66,2.65)                                    | 1.95(0.93,4.18)                                | 3.47(1.54,7.97)                     |

|         |      |                 |                 |                 |                 |
|---------|------|-----------------|-----------------|-----------------|-----------------|
| Model 3 | 1.00 | 0.98(0.50,1.98) | 1.29(0.63,2.73) | 2.13(0.98,4.77) | 2.94(1.24,7.07) |
|---------|------|-----------------|-----------------|-----------------|-----------------|

Abbreviation: BMI, body mass index; OR, odds ratios; 95%CI, 95% confidence intervals; T2D, type 2 diabetes

Model 1: crude model.

Model 2: Adjusted for sex and age.

Model 3: Adjusted for sex, age, education, marital status, smoking, alcohol consumption, physical activity, SBP, DBP, WC, ALT, AST, GGT, LDH, hs-CRP, Uric acid to creatinine ratio, Albumin to globulin ratio TC, TG, Platelet count, dyslipidemia, hypertension, CVD, and cancer.

**Table S6.** Subgroup analysis of weight change across three lifespans and liver fibrosis risk among T2D patients

| Liver Fibrosis                                            | Stable Normal | Weight Loss | Weight Gain     | Stable Obese    | <i>p</i> -interaction |
|-----------------------------------------------------------|---------------|-------------|-----------------|-----------------|-----------------------|
|                                                           | Reference     | OR (95% CI) | OR (95% CI)     | OR (95% CI)     |                       |
| BMI <sub>age 25</sub> to BMI <sub>10 years prior</sub>    |               |             |                 |                 |                       |
| Sex                                                       |               |             |                 |                 | 0.766                 |
| Males                                                     | 1.00          | -           | 1.94(1.06,3.55) | 1.52(0.51,4.51) |                       |
| Female                                                    | 1.00          | -           | 1.88(0.87,4.06) | 2.42(0.85,6.89) |                       |
| 2017 - 2018 cycle Age (years)                             |               |             |                 |                 | 0.942                 |
| $\geq 65$                                                 | 1.00          | -           | 1.63(0.87,3.08) | 2.08(0.64,6.73) |                       |
| $< 65$                                                    | 1.00          | -           | 2.19(1.10,4.36) | 2.00(0.78,5.15) |                       |
| Disease duration(years)                                   |               |             |                 |                 | 0.703                 |
| $\geq 10$                                                 | 1.00          | -           | 2.03(1.03,4.00) | 1.82(0.59,5.65) |                       |
| $< 10$                                                    | 1.00          | -           | 1.67(0.74,3.78) | 1.79(0.54,5.94) |                       |
| BMI <sub>age 25</sub> to BMI <sub>2017 - 2018 cycle</sub> |               |             |                 |                 |                       |
| Sex                                                       |               |             |                 |                 | 0.617                 |
| Males                                                     | 1.00          | -           | 3.26(1.73,6.14) | 2.95(0.95,9.17) |                       |
| Female                                                    | 1.00          | -           | 1.85(0.82,4.18) | 2.61(0.86,7.93) |                       |

|                                       |      |                 |                 |                  |       |
|---------------------------------------|------|-----------------|-----------------|------------------|-------|
| 2017 - 2018 cycle Age (years)         |      |                 |                 |                  | 0.999 |
| ≥65                                   | 1.00 | -               | 2.63(1.36,5.09) | 2.87(0.87,9.45)  |       |
| <65                                   | 1.00 | -               | 2.80(1.32,5.92) | 3.23(1.15,9.07)  |       |
| Disease duration(years)               |      |                 |                 |                  | 0.037 |
| ≥10                                   | 1.00 | -               | 4.00(1.75,9.10) | 4.88(1.38,17.35) |       |
| <10                                   | 1.00 | -               | 1.85(0.86,4.00) | 1.81(0.57,5.76)  |       |
| BMI 10 years prior to BMI 2017 - 2018 |      |                 |                 |                  |       |
| cycle                                 |      |                 |                 |                  |       |
| Sex                                   |      |                 |                 |                  | 0.600 |
| Males                                 | 1.00 | 0.77(0.25,2.35) | 2.38(0.89,6.40) | 3.64(1.79,7.42)  |       |
| Female                                | 1.00 | 1.80(0.38,8.40) | 1.68(0.53,5.31) | 2.73(1.07,6.95)  |       |
| 2017 - 2018 cycle Age (years)         |      |                 |                 |                  | 0.414 |
| ≥65                                   | 1.00 | 1.47(0.50,4.32) | 3.41(1.22,9.53) | 2.98(1.39,6.42)  |       |
| <65                                   | 1.00 | 0.50(0.10,2.51) | 1.52(0.52,4.43) | 3.56(1.59,7.95)  |       |
| Disease duration(years)               |      |                 |                 |                  | 0.489 |
| ≥10                                   | 1.00 | 1.19(0.31,4.50) | 2.66(0.94,7.58) | 3.55(1.54,8.21)  |       |
| <10                                   | 1.00 | 0.62(0.16,2.43) | 0.86(0.15,2.53) | 2.64(1.09,6.39)  |       |

Abbreviation: BMI, body mass index; OR, odds ratios; 95%CI, 95% confidence intervals; T2D, type 2 diabetes

This model has adjusted for sex, age, education, marital status, smoking, alcohol consumption, physical activity, SBP, DBP, WC, ALT, AST, GGT, LDH, hs-CRP, Uric acid to creatinine ratio, Albumin to globulin ratio TC, TG, Platelet count, dyslipidemia, hypertension, CVD, and cancer.

**Table S7.** Population attributable fractions (PAF) for population counterfactuals of fibrosis among T2D patients

| Scenario                 | Definition                                                                                           | PAF (%), 95% CI of Total Population |
|--------------------------|------------------------------------------------------------------------------------------------------|-------------------------------------|
| Weight loss              | If those who gained weight from early adulthood instead loss weight during middle and late adulthood | 60.71(39.75, 64.83)                 |
| Weight maintenance       | If those who gained weight during adulthood had not gained weight                                    | 58.55(37.05, 72.71)                 |
| Partial prevention       | If the total population maintained non-obese (BMI < 30 kg/m <sup>2</sup> ) during the life course    | 53.70(30.24, 69.28)                 |
| Comprehensive prevention | If the total population had a normal BMI (BMI < 25 kg/m <sup>2</sup> ) cross adulthood               | 64.96(-5.13, 88.32)                 |

Abbreviation: BMI, body mass index; PAF, population attributable fractions;

**Table S8.** Sensitivity analysis of the association between weight change and liver fibrosis in T2D patients

| Outcome                                                           | Stable Non-obese<br>(Reference) | Weight Loss<br>OR (95% CI) | Weight Gain<br>OR (95% CI) | Stable Obese<br>OR (95% CI) |
|-------------------------------------------------------------------|---------------------------------|----------------------------|----------------------------|-----------------------------|
| <b>Mild liver fibrosis</b>                                        |                                 |                            |                            |                             |
| BMI <sub>age 25</sub> to BMI <sub>10 years prior</sub>            |                                 |                            |                            |                             |
| Events/Total                                                      | 13/249                          | 0/11                       | 22/225                     | 4/45                        |
| Model 1                                                           | 1.00                            | -                          | 1.97(0.97,4.01)            | 1.77(0.55,5.70)             |
| Model 2                                                           | 1.00                            | -                          | 2.02(0.99,4.13)            | 1.44(0.44,4.73)             |
| Model 3                                                           | 1.00                            | -                          | 2.20(0.99,4.88)            | 1.64(0.46,5.90)             |
| BMI <sub>age 25</sub> to BMI <sub>2017 - 2018 cycle</sub>         |                                 |                            |                            |                             |
| Events/Total                                                      | 13/244                          | 0/16                       | 22/230                     | 4/40                        |
| Model 1                                                           | 1.00                            | -                          | 1.88(0.92,3.83)            | 1.97(0.61,6.39)             |
| Model 2                                                           | 1.00                            | -                          | 1.82(0.88,3.75)            | 1.67(0.50,5.59)             |
| Model 3                                                           | 1.00                            | -                          | 1.75(0.79,3.91)            | 1.83(0.51,6.64)             |
| BMI <sub>10 years prior</sub> to BMI <sub>2017 - 2018 cycle</sub> |                                 |                            |                            |                             |
| Events/Total                                                      | 9/198                           | 4/62                       | 4/62                       | 22/208                      |
| Model 1                                                           | 1.00                            | 1.45(0.43,4.88)            | 1.45(0.44,4.86)            | 2.48(1.11,5.54)             |

|                                                                   |        |                 |                 |                 |
|-------------------------------------------------------------------|--------|-----------------|-----------------|-----------------|
| Model 2                                                           | 1.00   | 1.43(0.42,4.84) | 1.35(0.40,4.61) | 2.41(1.07,5.43) |
| Model 3                                                           | 1.00   | 1.48(0.41,5.29) | 1.17(0.29,4.70) | 2.66(1.07,6.60) |
| Advanced liver fibrosis                                           |        |                 |                 |                 |
| BMI <sub>age 25</sub> to BMI <sub>10 years prior</sub>            |        |                 |                 |                 |
| Events/Total                                                      | 29/278 | 0/11            | 51/276          | 12/57           |
| Model 1                                                           | 1.00   | -               | 1.95(1.19,3.18) | 2.29(1.09,4.82) |
| Model 2                                                           | 1.00   | -               | 1.95(1.20,3.19) | 2.28(1.07,4.85) |
| Model 3                                                           | 1.00   | -               | 1.65(0.98,2.81) | 1.96(0.87,4.41) |
| BMI <sub>age 25</sub> to BMI <sub>2017 - 2018 cycle</sub>         |        |                 |                 |                 |
| Events/Total                                                      | 19/263 | 0/16            | 61/291          | 12/52           |
| Model 1                                                           | 1.00   | -               | 3.41(1.91,5.88) | 3.85(1.74,8.54) |
| Model 2                                                           | 1.00   | -               | 3.57(2.06,6.21) | 4.15(1.83,9.39) |
| Model 3                                                           | 1.00   | -               | 3.06(1.71,5.49) | 3.64(1.52,8.74) |
| BMI <sub>10 years prior</sub> to BMI <sub>2017 - 2018 cycle</sub> |        |                 |                 |                 |
| Events/Total                                                      | 15/213 | 4/66            | 14/76           | 59/267          |
| Model 1                                                           | 1.00   | 0.85(0.27,2.66) | 2.98(1.36,6.52) | 3.74(2.06,6.82) |
| Model 2                                                           | 1.00   | 0.82(0.26,2.57) | 3.14(1.42,6.91) | 3.89(2.13,7.12) |



|                                                                   |        |                 |                 |                 |
|-------------------------------------------------------------------|--------|-----------------|-----------------|-----------------|
| Model 3                                                           | 1.00   | 0.72(0.23,2.30) | 2.66(1.17,6.05) | 3.30(1.73,6.29) |
| Cirrhosis                                                         |        |                 |                 |                 |
| BMI <sub>age 25</sub> to BMI <sub>10 years prior</sub>            |        |                 |                 |                 |
| Events/Total                                                      | 14/278 | 0/11            | 22/276          | 5/57            |
| Model 1                                                           | 1.00   | -               | 1.63(0.82,3.26) | 1.81(0.63,5.25) |
| Model 2                                                           | 1.00   | -               | 1.65(0.83,3.30) | 1.74(0.59,5.12) |
| Model 3                                                           | 1.00   | -               | 1.50(0.72,3.14) | 1.41(0.42,4.76) |
| BMI <sub>age 25</sub> to BMI <sub>2017 - 2018 cycle</sub>         |        |                 |                 |                 |
| Events/Total                                                      | 10/263 | 0/16            | 26/291          | 5/52            |
| Model 1                                                           | 1.00   | -               | 2.48(1.17,5.25) | 2.69(0.88,8.23) |
| Model 2                                                           | 1.00   | -               | 2.57(1.21,5.49) | 2.75(0.88,8.65) |
| Model 3                                                           | 1.00   | -               | 2.34(1.06,5.19) | 2.34(0.65,8.46) |
| BMI <sub>10 years prior</sub> to BMI <sub>2017 - 2018 cycle</sub> |        |                 |                 |                 |
| Events/Total                                                      | 8/213  | 2/66            | 6/76            | 25/267          |
| Model 1                                                           | 1.00   | 0.80(0.17,3.87) | 2.20(0.74,6.55) | 2.65(1.17,6.00) |
| Model 2                                                           | 1.00   | 0.77(0.16,3.73) | 2.27(0.75,6.83) | 2.73(1.20,6.21) |
| Model 3                                                           | 1.00   | 0.72(0.15,3.59) | 2.04(0.65,6.35) | 2.45(1.06,5.92) |

Abbreviation: BMI, body mass index; OR, odds ratios; 95% CI, 95% confidence intervals

Model 1: Crude model.

Model 2: Adjusted for sex and age.

Model 3: Adjusted for sex, age, education, marital status, smoking, alcohol consumption, physical activity, SBP, DBP, WC, ALT, AST, GGT, LDH, hs-CRP, Uric acid to creatinine ratio, Albumin to globulin ratio TC, TG, Platelet count, dyslipidemia, hypertension, CVD, and cancer.

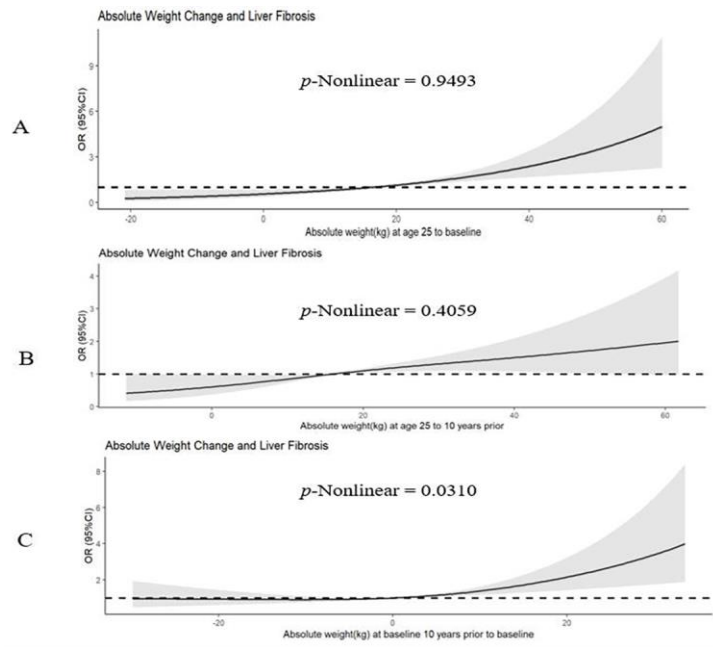

**Figure S1.** Dose-response curves of absolute weight change associated with liver fibrosis risk among T2D patients.
